# Supplementary material for: Self-Reported Hearing-Aid Use Patterns in an Adult Danish Population
Source: Audiol Res. 2023 Mar 27;13(2):221–35. doi: 10.3390/audiolres13020021 (PMC10135679; doi:10.3390/audiolres13020021)
Supplement: Supplementary file 1 [file audiolres-13-00021-s001.zip › audiolres-2222238-supplementary.pdf]

Figure S1: Flow chart showing participant inclusion and exclusion criteria for further analysis of responses to the question regarding the situations where participants always take off their hearing aids (HAs).

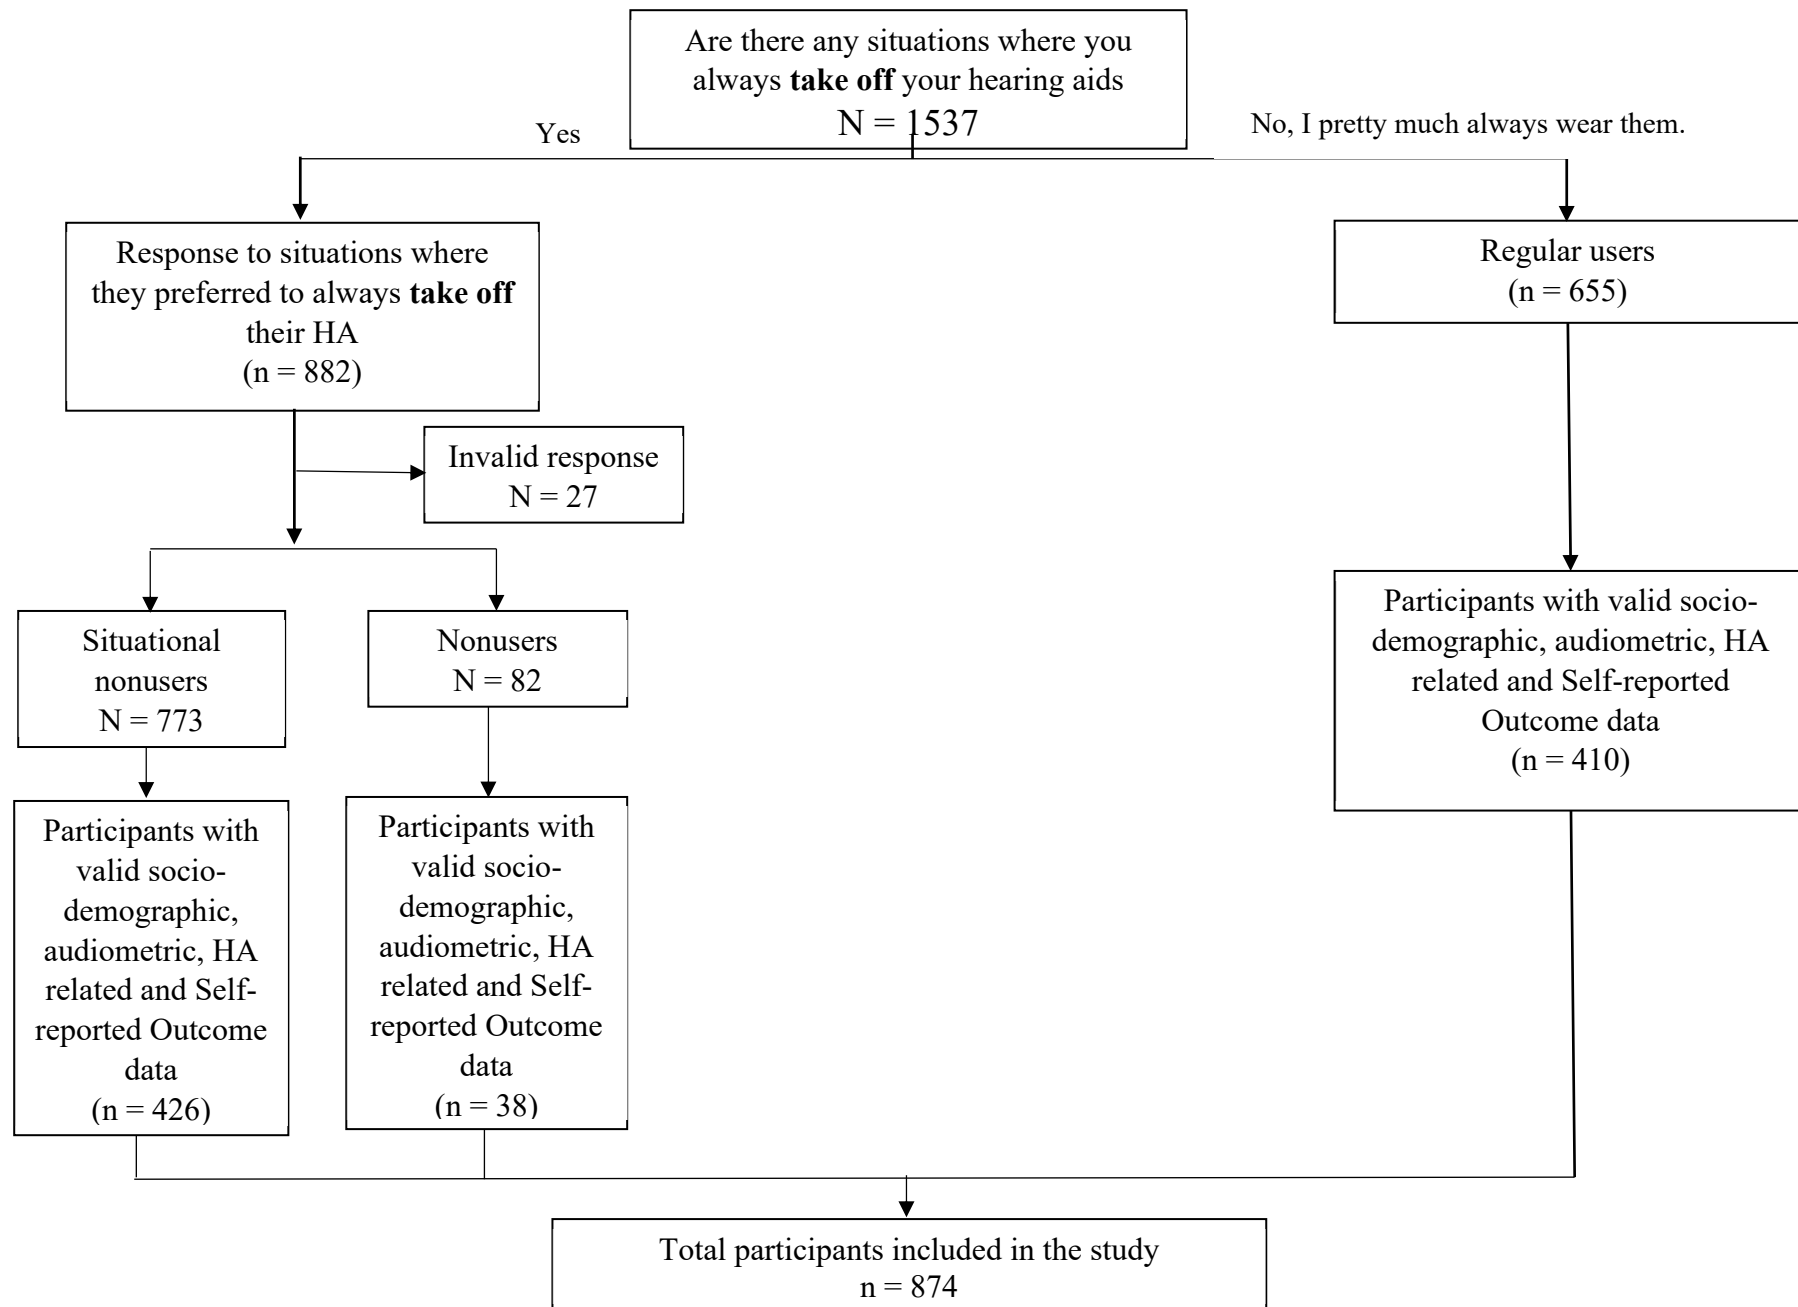

Figure S2: Flow chart showing participant inclusion and exclusion criteria for further analysis of responses to the question regarding the situations where participants always put on their hearing aids (HAs).

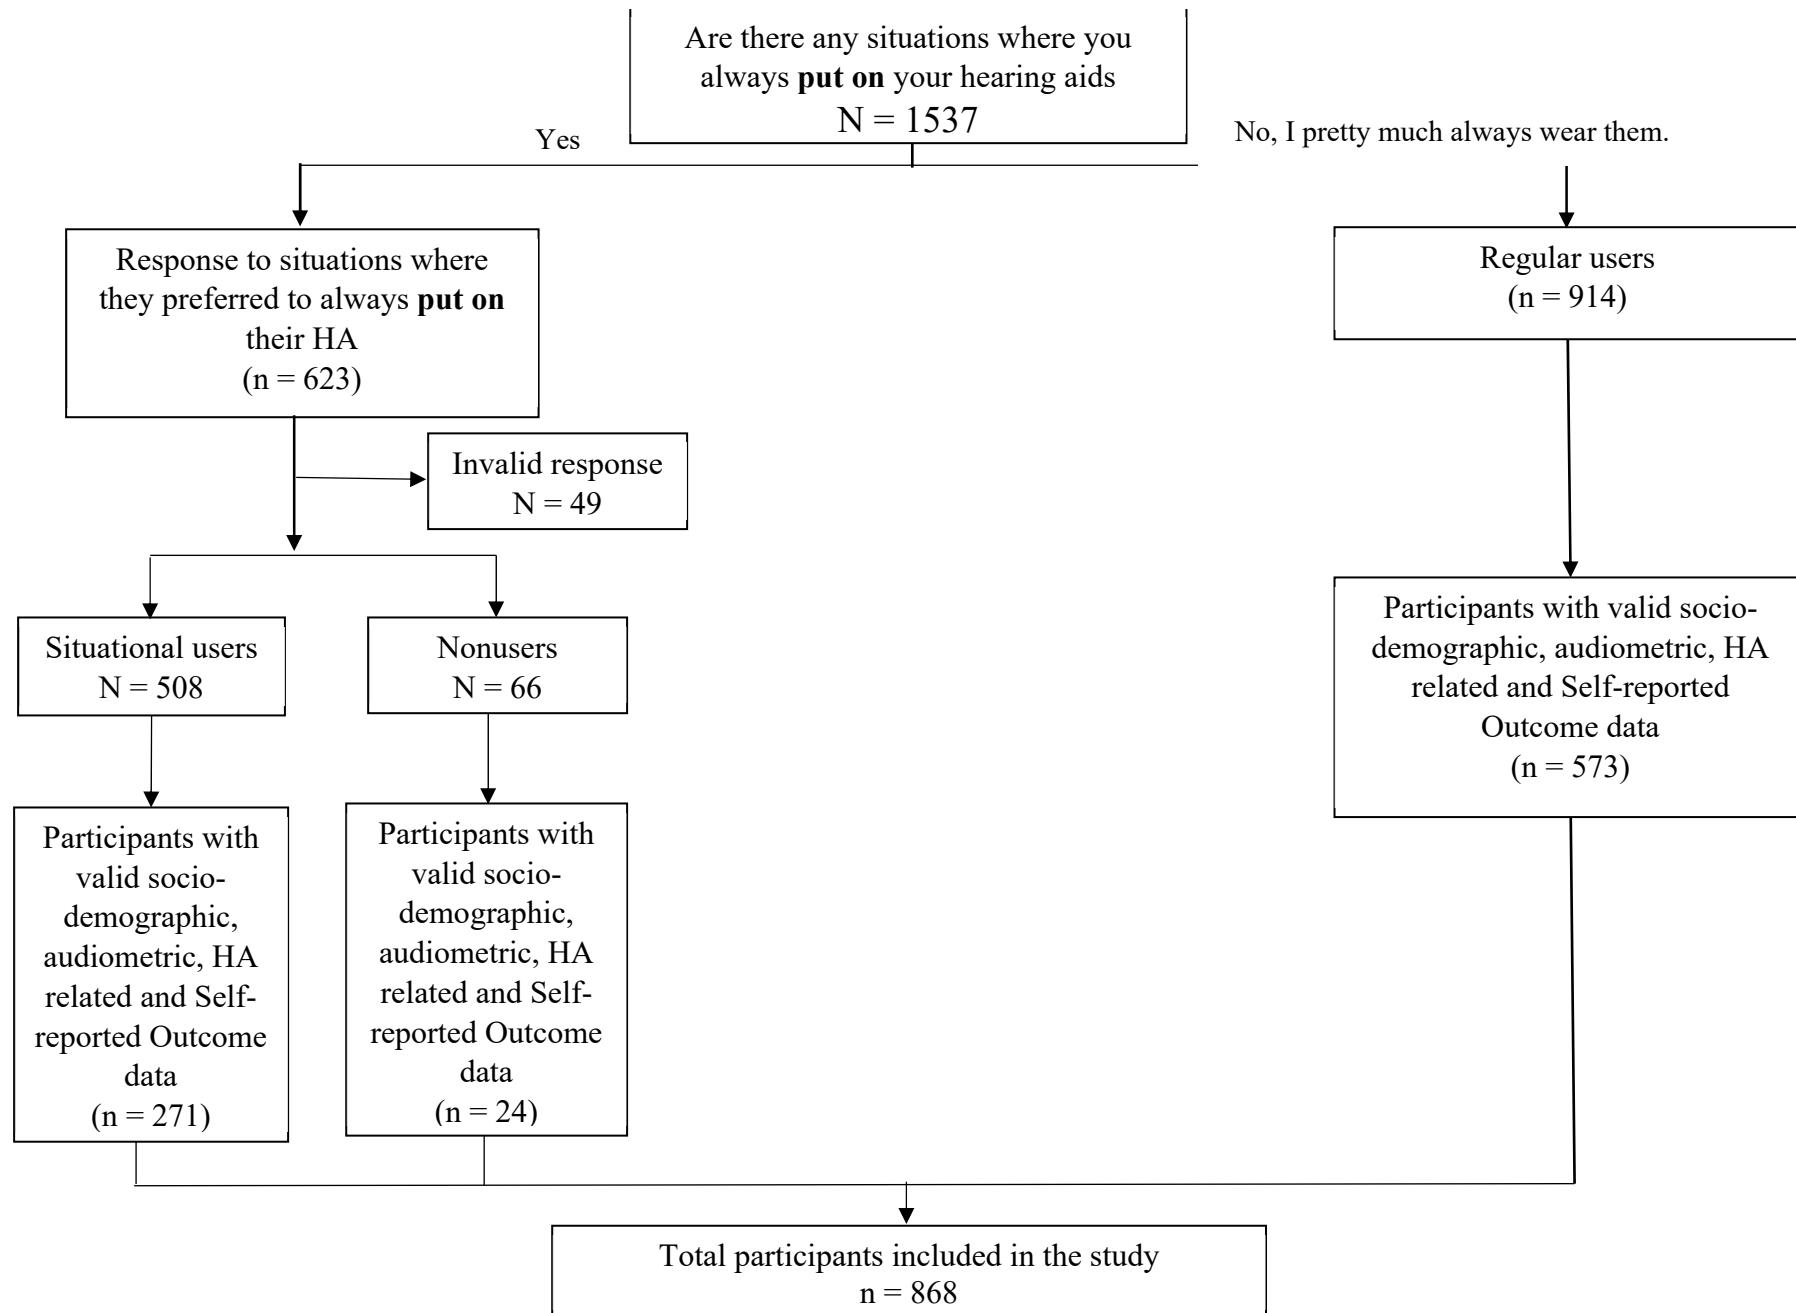

Table S1: Goodness of fit table for Situations where hearing aid (HA) users preferred to take off their HA:

|           | logLik   | AIC     | CAIC    | BIC     | Entropy | Res.Df | G <sup>2</sup> | p    |
|-----------|----------|---------|---------|---------|---------|--------|----------------|------|
| 2 Classes | -2150.17 | 4382.34 | 4589.57 | 4548.57 | 0.85    | 384    | 856.54         | 0.00 |
| 3 Classes | -2101.40 | 4326.81 | 4640.18 | 4578.18 | 0.83    | 363    | 759.00         | 0.00 |
| 4 Classes | -2066.37 | 4298.74 | 4718.26 | 4635.26 | 0.86    | 342    | 688.93         | 0.02 |
| 5 Classes | -2036.39 | 4280.79 | 4806.45 | 4702.45 | 0.89    | 321    | 628.98         | 0.00 |
| 6 Classes | -2006.20 | 4262.40 | 4894.20 | 4769.20 | 0.87    | 300    | 568.59         | 0.00 |

Table S2: Goodness of fit table for Situations where hearing aid (HA) users preferred to put on their HAs

|           | logLik   | AIC     | CAIC    | BIC     | Entropy | Res.Df | G <sup>2</sup> | p    |
|-----------|----------|---------|---------|---------|---------|--------|----------------|------|
| 2 Classes | -1153.48 | 2360.95 | 2485.21 | 2458.21 | 0.92    | 243    | 453.58         | 0.00 |
| 3 Classes | -1127.90 | 2337.79 | 2526.48 | 2485.48 | 0.95    | 229    | 402.42         | 0.00 |
| 4 Classes | -1107.34 | 2324.68 | 2577.80 | 2522.80 | 0.86    | 215    | 361.31         | 0.00 |
| 5 Classes | -1084.49 | 2306.97 | 2624.52 | 2555.52 | 0.94    | 201    | 315.61         | 0.00 |
| 6 Classes | -1075.46 | 2316.92 | 2698.90 | 2615.90 | 0.90    | 187    | 297.56         | 0.00 |

## Appendix C

Table S3: The covariate distribution across latent classes of situations where users always preferred to take off their hearing aids (HAs). The p-values were computed from  $\chi^2$ -analyses for categorical variables or Kruskal–Wallis test for continuous variables. Fisher's exact test was used for categorical variables when the expected frequency was less than 5. Significance levels  $p < 0.05$  are marked in bold.

| Covariates                                           | Regular users<br>N = 410 | Situational Non-users |                 |                 | Non-users<br>N=38 | <i>p</i>            |
|------------------------------------------------------|--------------------------|-----------------------|-----------------|-----------------|-------------------|---------------------|
|                                                      |                          | Class 1<br>N=264      | Class 2<br>N=85 | Class 3<br>N=77 |                   |                     |
| Mean age, years ( $\pm$ SD)                          | 66 (10)                  | 66 (11)               | 66 (10)         | 65 (11)         | 64 (11)           | 0.41                |
| Gender (Female), n                                   | 168                      | 77                    | 24              | 45              | 17                | <b>&lt;0.001***</b> |
| User Type (First-time users), n                      | 264                      | 184                   | 76              | 57              | 31                | <b>&lt;0.001***</b> |
| Mean better hearing ear PTA4, dB HL( $\pm$ SD)       | 39 (12)                  | 36 (13)               | 35 (10)         | 37 (11)         | 32 (10)           | <b>&lt;0.001***</b> |
| Mean better hearing ear WRS, % ( $\pm$ SD)           | 89 (15)                  | 90 (15)               | 92 (9)          | 92 (11)         | 92 (8)            | 0.66                |
| PTA-based asymmetry, n                               | 81                       | 52                    | 26              | 4               | 6                 | <b>0.002**</b>      |
| Tinnitus (Present), n                                | 69                       | 53                    | 23              | 15              | 9                 | 0.24                |
| Mean motivation Q1 score (Readiness) ( $\pm$ SD)     | 8.5 (1.7)                | 8.1 (1.9)             | 7.7 (2.1)       | 8 (2)           | 7.7 (1.7)         | <b>&lt;0.001***</b> |
| Mean motivation Q2 score (Self-efficacy) ( $\pm$ SD) | 8.6 (1.6)                | 8 (2.1)               | 7.5 (2)         | 8 (2)           | 7.5 (2.2)         | <b>&lt;0.001***</b> |
| Work status, n                                       |                          |                       |                 |                 |                   |                     |
| Not part of the job market                           | 292                      | 192                   | 62              | 51              | 23                | 0.50                |
| Not working                                          | 14                       | 8                     | 3               | 6               | 1                 |                     |
| Working                                              | 104                      | 64                    | 20              | 20              | 14                |                     |
| Household members, n                                 |                          |                       |                 |                 |                   |                     |
| Alone                                                | 72                       | 46                    | 21              | 24              | 10                | 0.15                |
| Two members                                          | 303                      | 197                   | 58              | 48              | 27                |                     |
| Three members and above                              | 35                       | 21                    | 6               | 5               | 1                 |                     |
| Income (in DKK), n                                   |                          |                       |                 |                 |                   |                     |
| Under 100,000                                        | 9                        | 5                     | 1               | 2               | 0                 | <b>0.001**</b>      |
| 100,000 to 300,000                                   | 113                      | 88                    | 15              | 25              | 14                |                     |
| 300,000 to 600,000                                   | 152                      | 89                    | 45              | 22              | 12                |                     |
| 600,000 to 900,000                                   | 44                       | 38                    | 5               | 11              | 9                 |                     |
| 900,000 and above                                    | 13                       | 7                     | 6               | 8               | 0                 |                     |
| Don't know / Undisclosed                             | 79                       | 37                    | 13              | 9               | 3                 |                     |

Table S4: The covariate distribution across latent classes of situations where users always preferred to put on their HAs. The p-values were computed from  $\chi^2$  -analyses for categorical variables or Kruskal–Wallis test for continuous variables. Fisher's exact test was used for categorical variables when the expected frequency was less than 5. Significance levels  $p < 0.05$  are marked in bold.

| Covariates                                           | Regular users<br>N= 573 | Situational Users |                 |                 | Non-users<br>N=24 | <i>p</i>            |
|------------------------------------------------------|-------------------------|-------------------|-----------------|-----------------|-------------------|---------------------|
|                                                      |                         | Class 1<br>N=189  | Class 2<br>N=54 | Class 3<br>N=28 |                   |                     |
| Mean age, years ( $\pm$ SD)                          | 67 (10)                 | 68 (9)            | 55 (13)         | 64 (13)         | 62 (13)           | <b>&lt;0.001***</b> |
| Gender (Female), n                                   | 219                     | 62                | 23              | 14              | 13                | 0.13                |
| User Type (First-time users), n                      | 370                     | 160               | 41              | 15              | 20                | <b>&lt;0.001***</b> |
| Mean better hearing ear PTA4, dB HL( $\pm$ SD)       | 38 (13)                 | 35 (11)           | 32 (11)         | 40 (12)         | 33 (10)           | <b>&lt;0.001***</b> |
| Mean better hearing ear WRS, % ( $\pm$ SD)           | 90 (15)                 | 91 (11)           | 94 (11)         | 90 (11)         | 94 (7)            | 0.12                |
| PTA-based asymmetry, n                               | 116                     | 34                | 7               | 6               | 6                 | 0.65                |
| Tinnitus (Present), n                                | 102                     | 44                | 13              | 6               | 5                 | 0.47                |
| Mean motivation Q1 score (Readiness) ( $\pm$ SD)     | 8.5 (1.7)               | 7.6 (2)           | 7.9 (1.8)       | 8.4 (2.1)       | 8 (2.3)           | <b>&lt;0.001***</b> |
| Mean motivation Q2 score (Self-efficacy) ( $\pm$ SD) | 8.6 (1.6)               | 7.4 (2.2)         | 7.9 (2)         | 8 (1.9)         | 7.2 (2.5)         | <b>&lt;0.001***</b> |
| Work status, n                                       |                         |                   |                 |                 |                   |                     |
| Not part of the job market                           | 421                     | 154               | 8               | 17              | 14                | <b>&lt;0.001***</b> |
| Not working                                          | 16                      | 6                 | 6               | 1               | 1                 |                     |
| Working                                              | 136                     | 29                | 40              | 10              | 9                 |                     |
| Household members, n                                 |                         |                   |                 |                 |                   |                     |
| Alone                                                | 107                     | 141               | 11              | 8               | 4                 | <b>0.006**</b>      |
| Two members                                          | 418                     | 7                 | 32              | 20              | 17                |                     |
| Three members and above                              | 48                      | 41                | 11              | 0               | 3                 |                     |
| Income (in DKK), n                                   |                         |                   |                 |                 |                   |                     |
| Under 100,000                                        | 10                      | 5                 | 2               | 0               | 0                 | <b>&lt;0.001***</b> |
| 100,000 to 300,000                                   | 170                     | 58                | 7               | 9               | 8                 |                     |
| 300,000 to 600,000                                   | 212                     | 74                | 17              | 8               | 4                 |                     |
| 600,000 to 900,000                                   | 55                      | 23                | 19              | 3               | 7                 |                     |
| 900,000 and above                                    | 20                      | 4                 | 7               | 2               | 1                 |                     |
| Don't know / Undisclosed                             | 10                      | 25                | 2               | 6               | 4                 |                     |
